# Supplementary material for: A survey of the sorghum transcriptome using single-molecule long reads
Source: PubMed Central journal article supplement (PMC4931028; doi:10.1038/ncomms11706), 2016-06-24
Supplement: ncomms11706-s1.pdf [file ncomms11706-s1.pdf]

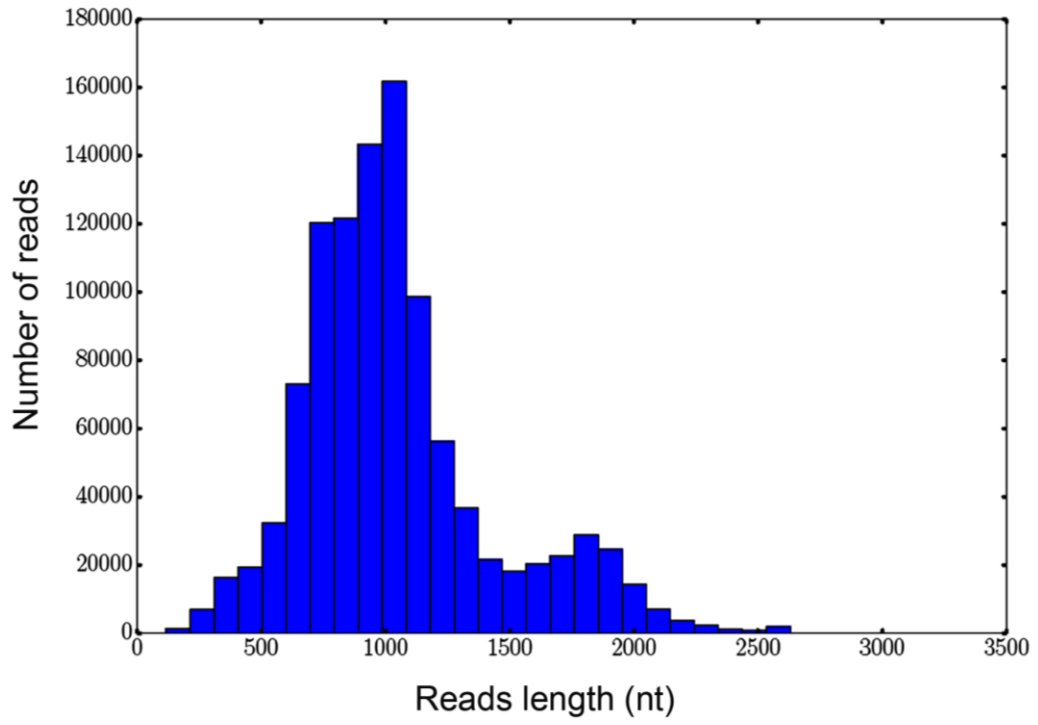

**Supplementary Figure 1: Length distribution of Iso-Seq reads**

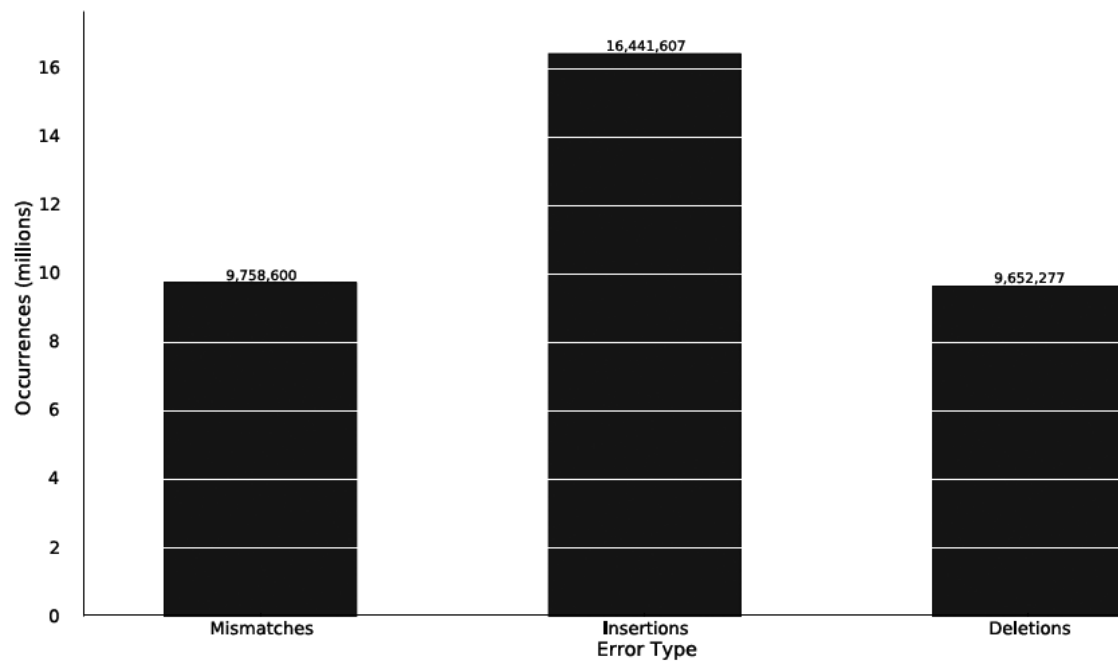

**Supplementary Figure 2:** Errors in Iso-Seq reads. Distribution of different types of errors in Iso-Seq data.

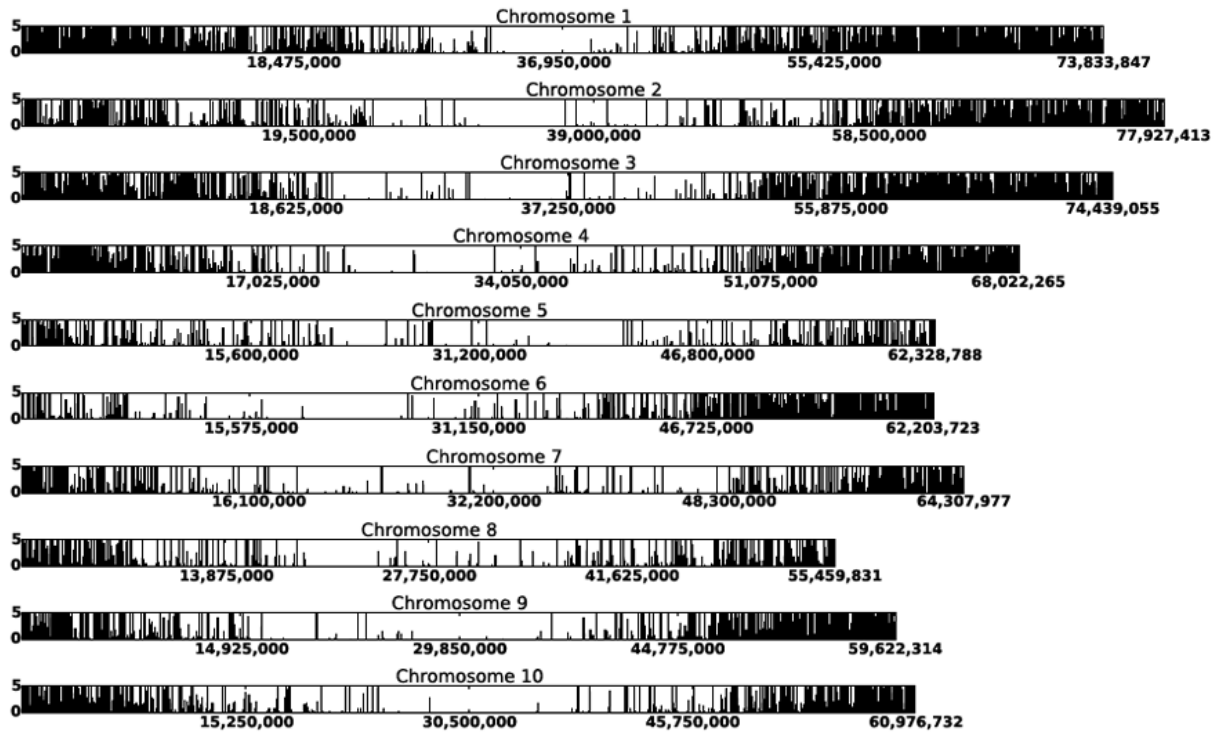

Supplementary Figure 3: Distribution of Iso-Seq reads along sorghum chromosomes

**Gene:** Sb04g006450

**Location:** Chr04: 6437981-6440779 forward

**Description:** Similar to KH domain-containing protein-like

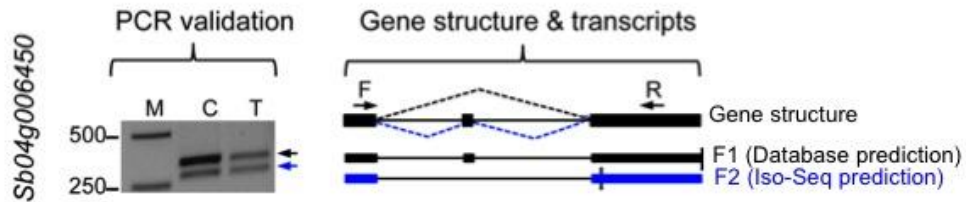

**Gene:** Sb08g020910

**Location:** Chr08: 52285286-52288546 forward

**Description:** Similar to Sterol desaturase family protein, expressed

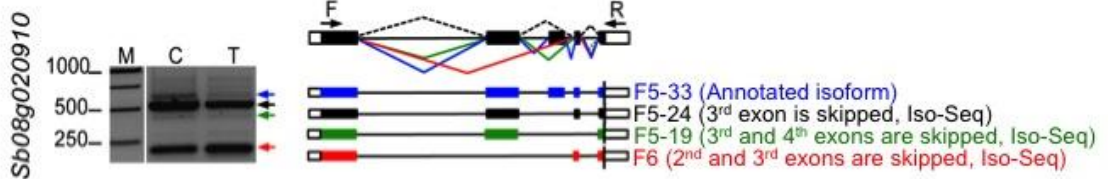

**Gene:** Sb08g004280

**Location:** Chr08: 5024397-5027834 forward

**Description:** Weakly similar to OSJNBb0003B01.20 protein

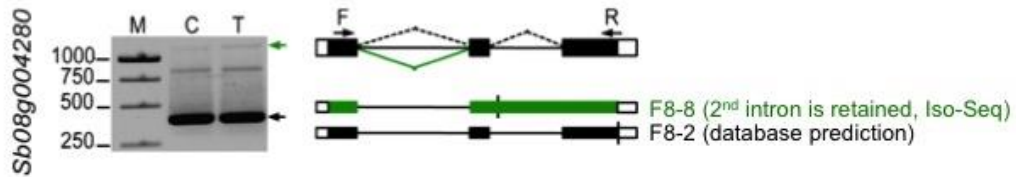

**Gene:** Sb05g013400  
**Location:** Chr05: 27748219-27752159 forward  
**Description:** Similar to protein family UPF0016 containing protein

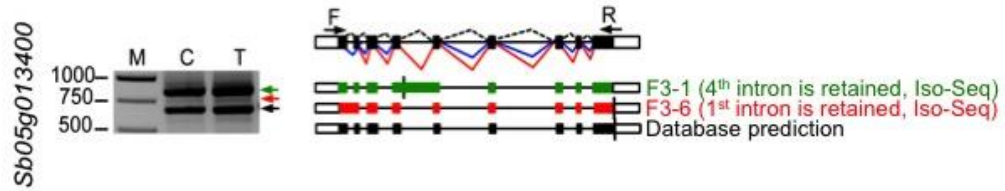

**Gene:** Sb04g021010  
**Location:** Chr04: 49187968-49192259 forward  
**Description:** Similar to Glycerophosphoryl diester phosphodisterase

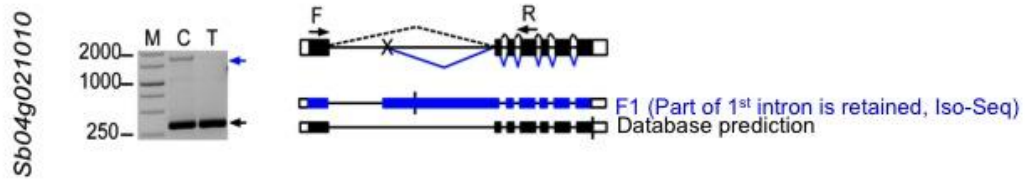

**Gene:** Sb04g005880  
**Location:** Chr04: 5686493-5689213 forward  
**Description:** similar to Metal-dependent hydrolase-like protein

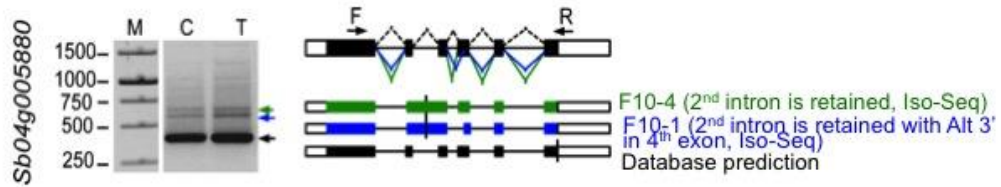

Supplementary Figure 4 (page 2 of 3)

**SbmiR159a**  
 >Chr03 Chr03:8124426..8124989 (- strand) class=match length=564

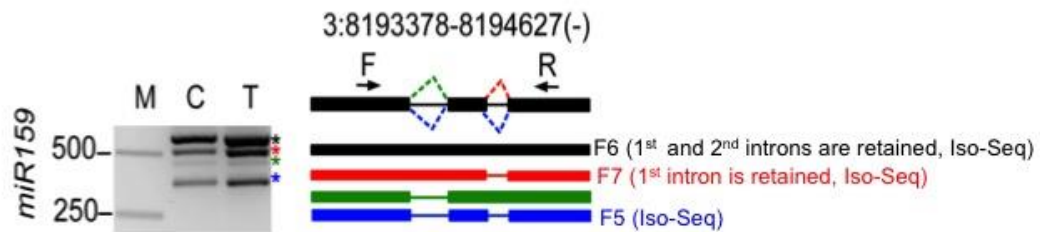

**SbmiR166**  
 Chromosome: Sorbi1: 10:59811600: 59812000:1

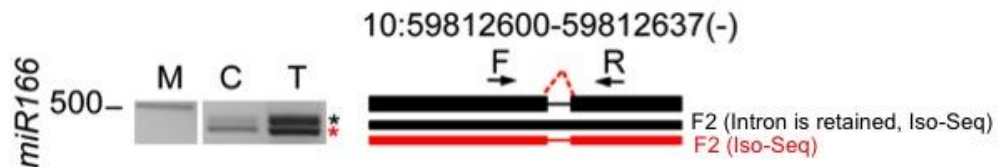

**SbmiR444**  
 >Chr04 Chr04:58976044..58981784 (+ strand) class=match length=5741

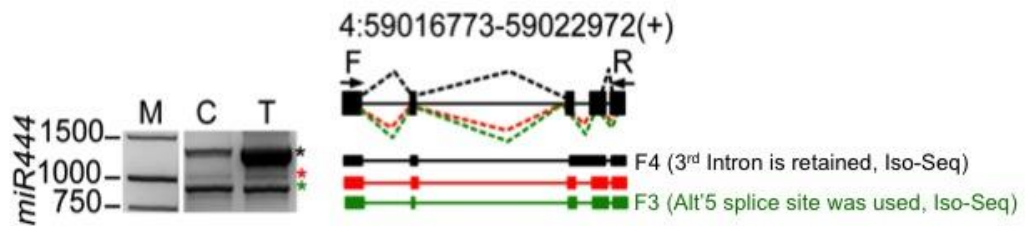

**Supplementary Figure 4.** PCR amplification of splice isoforms (left) and schematic representation (right) of different splice isoforms. The number adjacent to each isoform indicates the clone that provided evidence for that isoform. Exons are represented by boxes and introns by lines. Dotted lines represent the splicing events. Location of primers used in PCR are indicated with arrows. F, forward primer; R, reverse primer. Colored asterisks next to amplicons correspond to the same colored isoform in the schematic diagram.

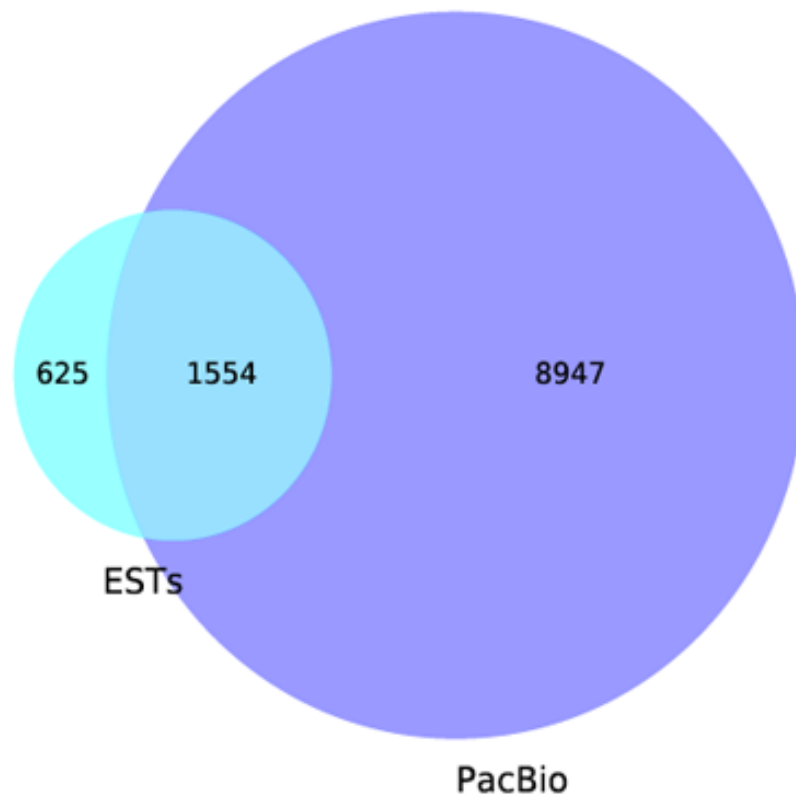

**Supplementary Figure 5: Overlap of poly(A) sites in ESTs and Iso-seq.**

Overlap of poly(A) sites found in EST data with sites found in our pipeline using Iso-Seq data from genes expressed in both datasets. Most sites (about 96%) were detected, indicating our method can provide reliable insight into poly(A) and more specifically, APA, from Iso-Seq reads.

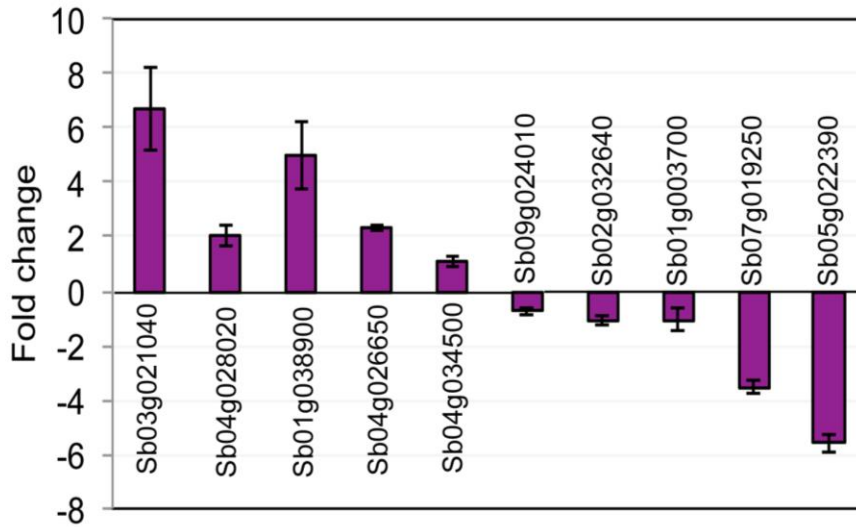

**Supplementary Figure 6. Validation of differentially expressed genes.** cDNA from control and treated tissues was used in qPCR to quantify gene expression. Expression was normalized to UBQ gene and then to control condition. Upward and downward columns represent induced and repressed genes, respectively, in response to drought treatment. Two biological replicates were used for each sample. Three technical replicates were done for each biological replicate. The mean of three technical replicates of each sample was used as the value of each biological replicate. Minimum and maximum value of expression for each gene is shown.



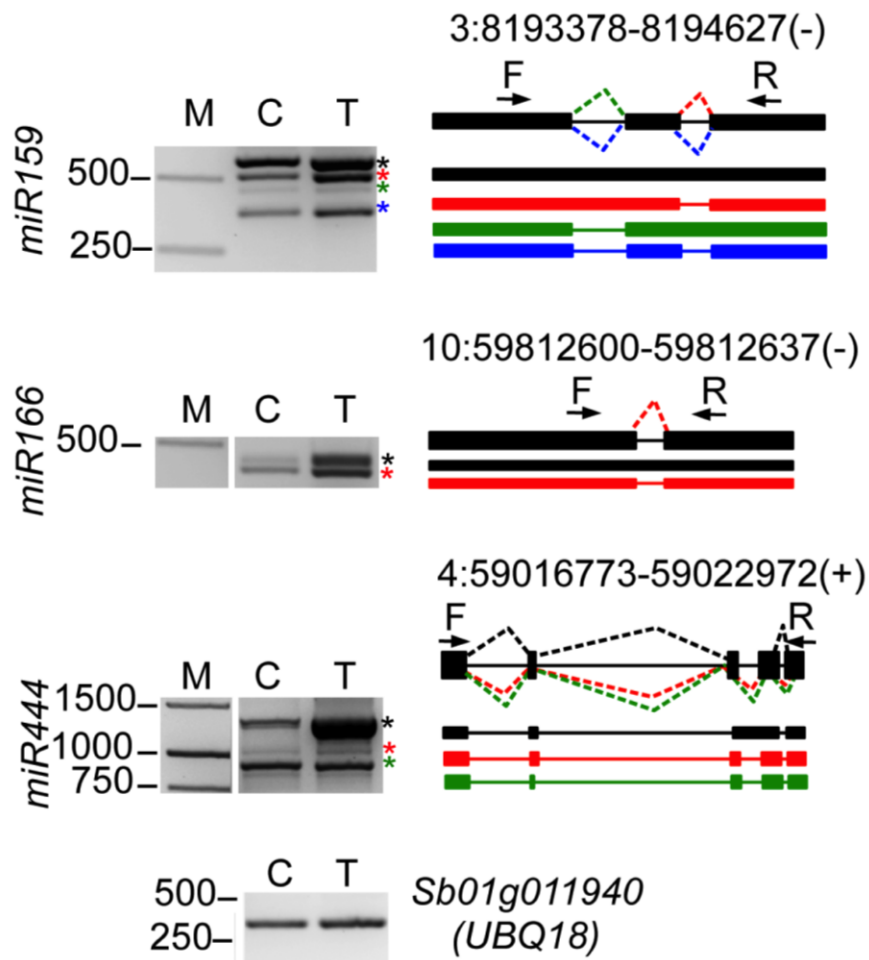

**Supplementary Figure 7:** Validation of expression and splicing of miRNAs by PCR. cDNAs prepared from control and treated tissues were used for validation of selected miRNA genes using primers designed to flank the splice junctions. PCR products were purified and sequenced. Exons are represented by filled boxes and introns by lines. Primer locations are represented by arrows. Chromosomal locations are shown above each panel. UBQ was used as an internal control for equal loading.

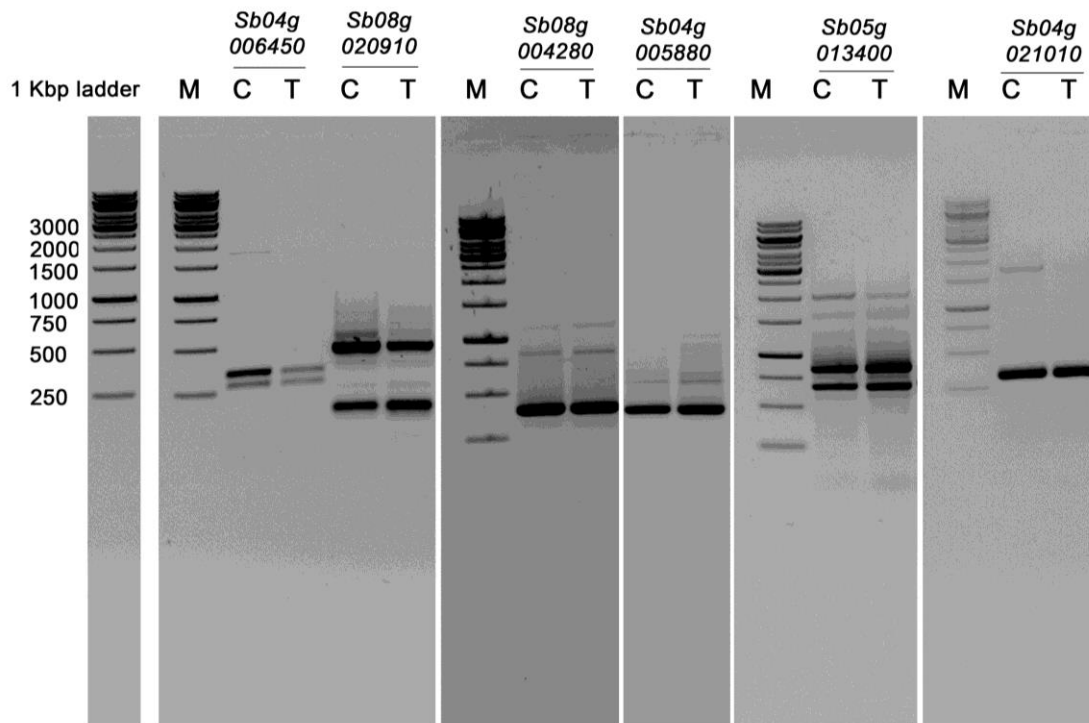

Supplementary Figure 8 (page 1 of 4)

Uncropped images used to prepare Figure 3

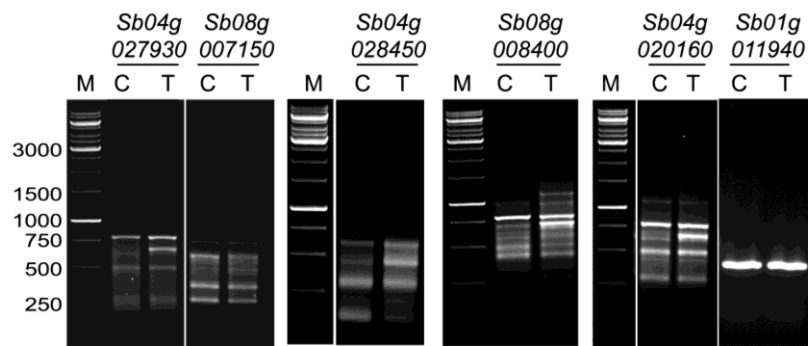

Supplementary Figure 8 (page 2 of 4)

Uncropped images used to prepare Figure 4

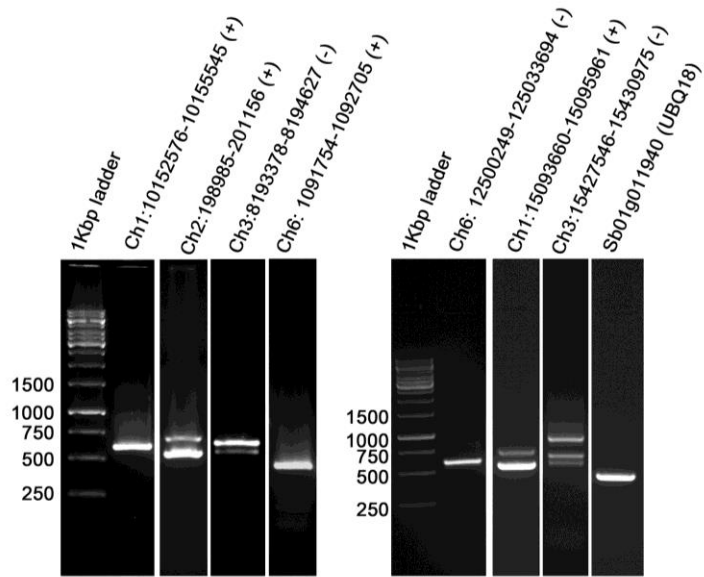

Supplementary Figure 8 (page 3 of 4)

Uncropped images used to prepare Figure 6

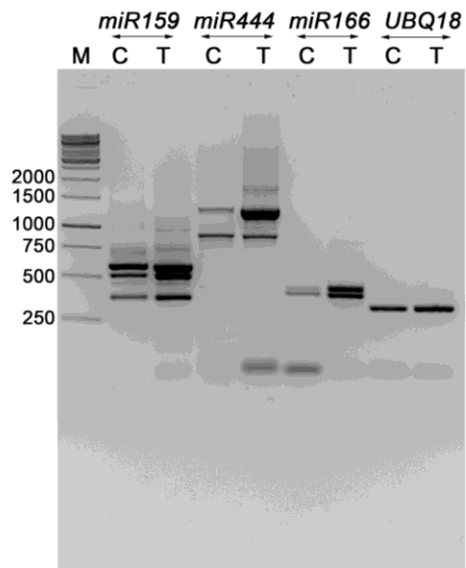

Supplementary Figure 8 (page 4 of 4)

Uncropped images used to prepare supplementary Figure 7

**Supplementary Figure 8. Full uncropped images of all gels used to prepare Figures 3, 4, 6 and the supplementary Figure 7**

**Supplementary Table 1.** Sequences of primers used for validation of splicing, alternative polyadenylation sites, predicted miRNAs, differentially expressed and novel genes. ES, exon skipping; IR, intron retention; Alt. 5', alternative donor site; Alt. 3', alternative acceptor site; DE, differential expression; (+) forward strand; (-) reverse strand. Coordinates of the novel and unannotated genes are indicated.

| Primer Name  | Sequence (5'-3')           | Locus                  | Validation  |
|--------------|----------------------------|------------------------|-------------|
| 4G078100-F   | ATGGACGGCGGCCGCAAGA        | <i>Sb04g006450</i>     | ES          |
| 4G078100-R   | AAGTGGCATTGTGACCCATT       |                        |             |
| 8G162700-F   | CCACTTATCTACTCCGCTGCA      | <i>Sb08g020910</i>     | ES          |
| 8G162700-R   | GATGGGTATATGTTACCGTTCA     |                        |             |
| 5G111900-F   | CTCCTCCTCGCCATCATCGTC      | <i>Sb05g013400</i>     | IR          |
| 5G111900-R   | TGCTCCGACTGCAACTCCAAT      |                        |             |
| 4G157300-F   | GACTACGTCGAGTTCGACGTCCA    | <i>Sb04g021010</i>     | Alt. 3'     |
| 4G157300-R   | GTGAGCTCTTCCTCCTGGTAT      |                        |             |
| 4G070000-F   | GACAAGCTCGACCTCGACGT       | <i>Sb04g005880</i>     | IR/Alt. 3'  |
| 4G070000-R   | CAGTGCAACATATATACTCCAG     |                        |             |
| 8G050800-F   | AGCAGGATGGCAAATACTTCAAC    | <i>Sb08g004280</i>     | IR          |
| 8G050800-R   | CTTTCTCCTCCTGCACTTGACA     |                        |             |
| F9L-F        | CATAGTAAATCCATCTTCTACG     | <i>Sb04g020160</i>     | Poly (A)    |
| AdenylateK-F | GATTGACTATTACTCCAAGAAGG    | <i>Sb08g008400</i>     |             |
| PyruvDH-F    | GTCCTTGAGATGGATACCTACA     | <i>Sb04g028450</i>     |             |
| GDSL-F       | TTGCATCATTGAGGCATCCGG      | <i>Sb08g007150</i>     |             |
| DBP-F        | CTGAGCTCAATTAGCTAGGGT      | <i>Sb04g027930</i>     |             |
| miR166-F     | GGTGGTGTAGATCTCGGACCA      | <i>Chr10:59812600-</i> | miRNAs      |
| miR166-R     | CCATCATTACACCAATCTGCATC    | <i>59812637 (-)</i>    |             |
| miR444-F     | AGACTCGCCGATACGATCCTT      | <i>Chr04:59016773-</i> |             |
| miR444-R     | CACATATATACAGGCAATGCAAAGAG | <i>59022972 (+)</i>    |             |
| miR159-F     | CCAAGATTCAATAGGCACGGT      | <i>Chr03:8193378-</i>  |             |
| miR159-R     | CAAACAAGCTTGGCGCAACCAT     | <i>8194627 (-)</i>     |             |
| A-novel-F    | TGTCATGTGCAGGGTCACATG      | <i>Chr01:10152576-</i> | Novel genes |
| A-novel-R    | GACCTCCTAGGTGTAGCTGGT      | <i>10155545(+)</i>     | & long non  |
| B-novel-F    | GTACGCTTGGGATAAATTGAG      | <i>Chr02:198985-</i>   | coding      |
| B-novel-R    | AAGCCATCATCTCCTATCAGC      | <i>201156(+)</i>       | RNAs        |
| C-novel-F    | CAAGCTTGGCGCAACCATGGCT     | <i>Chr03:8193378-</i>  |             |
| C-novel-R    | GATTCAATAGGCACGGTCTGC      | <i>8194627(-)</i>      |             |
| D-novel-F    | GTGCAGGAAAGTGCATCCTCAA     | <i>Chr06:1091754-</i>  |             |
| D-novel-R    | AATGGACAATGAATTGATCTGG     | <i>1092705(+)</i>      |             |
| E-novel-F    | GAAGTCTTAGCTTGCTGTCCATC    | <i>Chr06:12500249-</i> |             |
| E-novel-R    | CTCCTATGCAAGCTGCAAAGCTG    | <i>12503694(-)</i>     |             |
| LncRNA1-F    | AGGTGCTCATGGTGAAGAGGTG     | <i>Chr01:15093660-</i> |             |
| LncRNA1-R    | ACAGACAATGTATCCCATTTGTA    | <i>15095961(+)</i>     |             |
| LncRNA2-F    | TGCCATCCTGTGTAGCTGTGGT     | <i>Chr0:15427546-</i>  |             |
| LncRNA2-F    | TACAGCAGACCTTCTGAACTTG     | <i>15430975(-)</i>     |             |
| UBQ18-SQ-F   | AGACCTACAAGCTGCAGGTGGA     | <i>Sb01g011940</i>     | Internal    |

|                |                                       |                       |                |
|----------------|---------------------------------------|-----------------------|----------------|
| UBQ18-Q-R      | AAAGCAACGCCCGCCGATAA                  |                       | control        |
| UBQ18-R        | GGACAATCAGGAAACCCATCAC                |                       |                |
| AP             | GGCCACGCGTCGACTAGTAC(T) <sub>17</sub> | <i>Adaptor primer</i> | 3'RACE         |
| AUAP-R         | GGCCACGCGTCGACTAGTAC                  | <i>Reverse primer</i> |                |
| Sb03g021040-QF | CGCCATGTCATATAGCCACT                  | <i>Sb03g021040</i>    |                |
| Sb03g021040-QR | ACCATAGCCATTGTGTGGTG                  |                       |                |
| Sb04g028020-QF | TTGCATTACGTCCATCTTCG                  | <i>Sb04g028020</i>    |                |
| Sb04g028020-QR | CCAGAGTCCGGTGTAGAGGT                  |                       |                |
| Sb01g038900-QF | AGCCGTGTCTCAGATGAAGTTG                | <i>Sb01g038900</i>    |                |
| Sb01g038900-QR | AGGCTATATCCGCCAAGCTA                  |                       |                |
| Sb04g026650-QF | GCTTCCAGAGCGCCTACTAC                  | <i>Sb04g026650</i>    |                |
| Sb04g026650-QR | GAAGACGGTGTAGACGAGCA                  |                       |                |
| Sb04g034500-QF | CTGAGGAAGCTGCAGAAGTG                  | <i>Sb04g034500</i>    |                |
| Sb04g034500-QR | TGAACCTCTGGTCAGTGCTC                  |                       |                |
| Sb09g024010-QF | TTGAGCCACTGCCTATCAAG                  | <i>Sb09g024010</i>    | Validation of  |
| Sb09g024010-QR | GAAGTGGTTGCCAGAAGACA                  |                       | differentially |
| Sb02g032640-QF | GGAAGTAGGCCATGCTATCC                  | <i>Sb02g032640</i>    | expressed      |
| Sb02g032640-QR | AGGACACCACCATCAACAAA                  |                       | genes by       |
| Sb01g003700-QF | TTGGATGGTCTTCAACCAGA                  | <i>Sb01g003700</i>    | RT-qPCR        |
| Sb01g003700-QR | TAGGCGAGTCGGATTTCTCT                  |                       |                |
| Sb07g019250-QF | ACAGAGCTGCAATTGTTTGG                  | <i>Sb07g019250</i>    |                |
| Sb07g019250-QR | CCCTCCCTACCACTATTCCA                  |                       |                |
| Sb05g022390-QF | ATCGAGTGGAGCATCTGTTG                  | <i>Sb05g022390</i>    |                |
| Sb05g022390-QR | GAAATGCGACTTTCAGGGTT                  |                       |                |
